# Supplementary material
Source: publisher site journal article supplement (https://static.cambridge.org/content/id/urn:cambridge.org:id:article:S0022109020000307/resource/name/S0022109020000307supp001.pdf)
Supplement: Supplementary file 1 [file S0022109020000307supp001.pdf]

## Online Appendix:

### Table A1. Holdout Sample Tests: Experienced Directors and Forced CEO Turnovers

This table reports firm-level analyses of forced CEO departures for the even and odd year subsamples using our two primary measures of experienced boards (EXPERIENCED and EXPERIENCED\_AFTER\_JOINING) All variable definitions are in the Appendix. \*\*\*, \*\*, and \* denote significance at the 1, 5 and 10 percent levels, respectively.

| <i>Dependent variable: Forced CEO Turnover (1/0)</i> | Model 1              | Model 2             | Model 3             | Model 4             |
|------------------------------------------------------|----------------------|---------------------|---------------------|---------------------|
|                                                      | even                 | even                | even                | even                |
| EXPERIENCED                                          | 0.00004<br>(0.99)    |                     | 0.005<br>(0.39)     |                     |
| EXPERIENCED_AFTER_JOINING                            |                      | -0.003<br>(0.45)    |                     | -0.003<br>(0.57)    |
| STOCK_RETURN                                         | -0.006***<br>(<.01)  | -0.007***<br>(<.01) | -0.01***<br>(<.01)  | -0.011***<br>(<.01) |
| EXPERIENCED X STOCK_RETURN                           | -0.01**<br>(0.02)    |                     | -0.011*<br>(0.08)   |                     |
| EXPERIENCED_AFTER_JOINING X STOCK_RETURN             |                      | -0.011*<br>(0.06)   |                     | -0.013*<br>(0.09)   |
| CEO_OWNERSHIP                                        | 0.033*<br>(0.08)     | 0.034*<br>(0.07)    | 0.077**<br>(0.04)   | 0.077*<br>(0.05)    |
| Ln(CEO_TENURE)                                       | -0.0324***<br>(<.01) | -0.033***<br>(<.01) | -0.031***<br>(<.01) | -0.031***<br>(<.01) |
| CEO_CHAIR_DUALITY                                    | -0.002<br>(0.5)      | -0.00196<br>(0.52)  | 0.00054<br>(0.93)   | 0.00052<br>(0.91)   |
| BOARD_SIZE                                           | -0.001<br>(0.28)     | -0.001<br>(0.3)     | -0.001<br>(0.51)    | -0.001<br>(0.6)     |
| BUSY_BOARD                                           | -0.016**<br>(0.05)   | -0.016**<br>(0.05)  | -0.013<br>(0.19)    | -0.013<br>(0.21)    |
| Ln(SALES)                                            | 0.0003<br>(0.81)     | 0.0004<br>(0.76)    | 0.013***<br>(<.01)  | 0.013***<br>(<.01)  |
| TOBIN'S_Q                                            | -0.003***<br>(<.01)  | -0.003***<br>(<.01) | -0.003*<br>(0.06)   | -0.003*<br>(0.1)    |
| INST_OWNERSHIP_RATIO                                 | -0.011<br>(0.15)     | -0.011<br>(0.15)    | -0.005<br>(0.68)    | -0.005<br>(0.66)    |
| SALES_GROWTH                                         | -0.031***<br>(<.01)  | -0.031***<br>(<.01) | -0.032***<br>(<.01) | -0.032***<br>(<.01) |
| Observations                                         | 12733                | 12733               | 12063               | 12063               |
| Adjusted R-squared                                   | 3.92%                | 3.92%               | 7.49%               | 7.49%               |
| Fixed Effects                                        | Industry / Year      | Industry / Year     | Firm / Year         | Firm / Year         |

**Table A1. (continued)**

| <i>Dependent variable: Forced CEO Turnover (1/0)</i> | Model 1             | Model 2             | Model 3             | Model 4             |
|------------------------------------------------------|---------------------|---------------------|---------------------|---------------------|
|                                                      | odd                 | odd                 | odd                 | odd                 |
| EXPERIENCED                                          | 0.0068*<br>(0.05)   |                     | 0.016***<br>(<.01)  |                     |
| EXPERIENCED_AFTER_JOINING                            |                     | 0.004<br>(0.33)     |                     | 0.007<br>(0.19)     |
| STOCK_RETURN                                         | -0.01***<br>(<.01)  | -0.013***<br>(<.01) | -0.008**<br>(0.05)  | -0.011***<br>(<.01) |
| EXPERIENCED X STOCK_RETURN                           | -0.023***<br>(<.01) |                     | -0.024***<br>(<.01) |                     |
| EXPERIENCED_AFTER_JOINING X STOCK_RETURN             |                     | -0.017*<br>(0.07)   |                     | -0.019**<br>(0.03)  |
| CEO_OWNERSHIP                                        | 0.024*<br>(0.06)    | 0.025*<br>(0.06)    | 0.041<br>(0.18)     | 0.045<br>(0.25)     |
| Ln(CEO_TENURE)                                       | -0.032***<br>(<.01) | -0.032***<br>(<.01) | -0.032***<br>(<.01) | -0.032***<br>(<.01) |
| CEO_CHAIR_DUALITY                                    | -0.006**<br>(0.03)  | -0.006**<br>(0.04)  | -0.001<br>(0.89)    | 0<br>(0.92)         |
| BOARD_SIZE                                           | -0.003***<br>(<.01) | -0.003***<br>(<.01) | -0.004***<br>(<.01) | -0.004***<br>(<.01) |
| BUSY_BOARD                                           | 0.002<br>(0.82)     | 0.002<br>(0.77)     | 0.013<br>(0.15)     | 0.014<br>(0.15)     |
| Ln(SALES)                                            | 0.001<br>(0.55)     | 0.001<br>(0.43)     | 0.005<br>(0.18)     | 0.005<br>(0.17)     |
| TOBIN'S_Q                                            | -0.004***<br>(<.01) | -0.004***<br>(<.01) | -0.003**<br>(0.01)  | -0.003**<br>(0.03)  |
| INST_OWNERSHIP_RATIO                                 | -0.006<br>(0.39)    | -0.006<br>(0.4)     | -0.017<br>(0.12)    | -0.017*<br>(0.07)   |
| SALES_GROWTH                                         | -0.026***<br>(<.01) | -0.026***<br>(<.01) | -0.02***<br>(<.01)  | -0.02***<br>(<.01)  |
| Observations                                         | 13978               | 13978               | 13261               | 13261               |
| Adjusted R-squared                                   | 4.55%               | 4.48%               | 6.95%               | 6.83%               |
| Fixed Effects                                        |                     | Industry / Year     | Firm / Year         | Firm / Year         |

**Table A2. Holdout Sample Tests: Director-Firm-Year Level Regressions in Full Sample & Subsample**

This table reports analyses of forced CEO departures at the director-firm-year level for the even and odd year subsamples using our two primary measures of experienced directors (EXPERIENCED and EXPERIENCED\_AFTER\_JOINING). All variable definitions are in the Appendix. \*\*\*, \*\*, and \* denote significance at the 1, 5 and 10 percent levels, respectively.

| <i>Dependent variable: Forced CEO Turnover (1/0)</i> | Model 1                          | Model 2                          | Model 3                          | Model 4                         |
|------------------------------------------------------|----------------------------------|----------------------------------|----------------------------------|---------------------------------|
|                                                      | even                             | odd                              | even                             | odd                             |
| EXPERIENCED                                          | -0.0838***<br>( <i>&lt;.01</i> ) | -0.0662***<br>( <i>&lt;.01</i> ) |                                  |                                 |
| EXPERIENCED_AFTER_JOINING                            |                                  |                                  | -0.0974***<br>( <i>&lt;.01</i> ) | -0.069***<br>( <i>&lt;.01</i> ) |
| STOCK_RETURN                                         | -0.01***<br>( <i>&lt;.01</i> )   | -0.016***<br>( <i>&lt;.01</i> )  | -0.011***<br>( <i>&lt;.01</i> )  | -0.017***<br>( <i>&lt;.01</i> ) |
| EXPERIENCED X STOCK_RETURN                           | -0.008*<br>( <i>0.08</i> )       | -0.02***<br>( <i>&lt;.01</i> )   |                                  |                                 |
| EXPERIENCED_AFTER_JOINING X STOCK_RETURN             |                                  |                                  | -0.016**<br>( <i>0.04</i> )      | -0.022***<br>( <i>&lt;.01</i> ) |
| LN(AGE)                                              | 0<br>( <i>1</i> )                | -0.041<br>( <i>0.21</i> )        | 0.004<br>( <i>0.88</i> )         | -0.04<br>( <i>0.22</i> )        |
| OWNERSHIP                                            | 0.0047<br>( <i>0.95</i> )        | 0.1393<br>( <i>0.2</i> )         | 0.0042<br>( <i>0.96</i> )        | 0.131<br>( <i>0.24</i> )        |
| NUMBER_OF_DIRECTORSHIPS                              | 0<br>( <i>0.77</i> )             | -0.001<br>( <i>0.24</i> )        | 0.002<br>( <i>0.14</i> )         | 0<br>( <i>0.95</i> )            |
| LN(BOARD_TENURE)                                     | -0.008***<br>( <i>&lt;.01</i> )  | -0.005***<br>( <i>&lt;.01</i> )  | -0.013***<br>( <i>&lt;.01</i> )  | -0.008***<br>( <i>&lt;.01</i> ) |
| CEO_OWNERSHIP                                        | 0.052***<br>( <i>&lt;.01</i> )   | 0.071***<br>( <i>&lt;.01</i> )   | 0.051***<br>( <i>&lt;.01</i> )   | 0.068***<br>( <i>&lt;.01</i> )  |
| LN(CEO_TENURE)                                       | -0.0282***<br>( <i>&lt;.01</i> ) | -0.031***<br>( <i>&lt;.01</i> )  | -0.029***<br>( <i>&lt;.01</i> )  | -0.032***<br>( <i>&lt;.01</i> ) |
| CEO_CHAIR_DUALITY                                    | -0.004*<br>( <i>0.06</i> )       | -0.002<br>( <i>0.24</i> )        | -0.004**<br>( <i>0.04</i> )      | -0.002<br>( <i>0.18</i> )       |
| BOARD_SIZE                                           | -0.001***<br>( <i>&lt;.01</i> )  | -0.004***<br>( <i>&lt;.01</i> )  | -0.001***<br>( <i>&lt;.01</i> )  | -0.004***<br>( <i>&lt;.01</i> ) |
| BUSY_BOARD                                           | -0.016***<br>( <i>&lt;.01</i> )  | 0.006*<br>( <i>0.07</i> )        | -0.015***<br>( <i>&lt;.01</i> )  | 0.006*<br>( <i>0.09</i> )       |
| LN(SALES)                                            | 0.001<br>( <i>0.14</i> )         | 0.003***<br>( <i>&lt;.01</i> )   | 0.002*<br>( <i>0.08</i> )        | 0.004***<br>( <i>&lt;.01</i> )  |
| TOBIN'S_Q                                            | -0.003***<br>( <i>&lt;.01</i> )  | -0.003***<br>( <i>&lt;.01</i> )  | -0.003***<br>( <i>&lt;.01</i> )  | -0.003***<br>( <i>&lt;.01</i> ) |
| INST_OWNERSHIP_RATIO                                 | -0.008*<br>( <i>0.05</i> )       | -0.007*<br>( <i>0.05</i> )       | -0.008*<br>( <i>0.07</i> )       | -0.006*<br>( <i>0.09</i> )      |
| SALES_GROWTH                                         | -0.03***<br>( <i>&lt;.01</i> )   | -0.017***<br>( <i>&lt;.01</i> )  | -0.031***<br>( <i>&lt;.01</i> )  | -0.018***<br>( <i>&lt;.01</i> ) |
| Observations                                         | 77880                            | 87041                            | 77880                            | 87041                           |
| Adjusted R-squared                                   | 7.02%                            | 6.40%                            | 6.66%                            | 6.04%                           |
| Fixed Effects                                        | Director/Yr                      | Director/Yr                      | Director/Yr                      | Director/Yr                     |
